# Supplementary material for: Phenolic-glycolipid-1 and lipoarabinomannan preferentially modulate TCR- and CD28-triggered proximal biochemical events, leading to T-cell unresponsiveness in mycobacterial diseases
Source: PubMed Central journal article supplement (PMC3477116; doi:10.1186/1476-511x-11-119), 2012-09-17

Figure:-S1

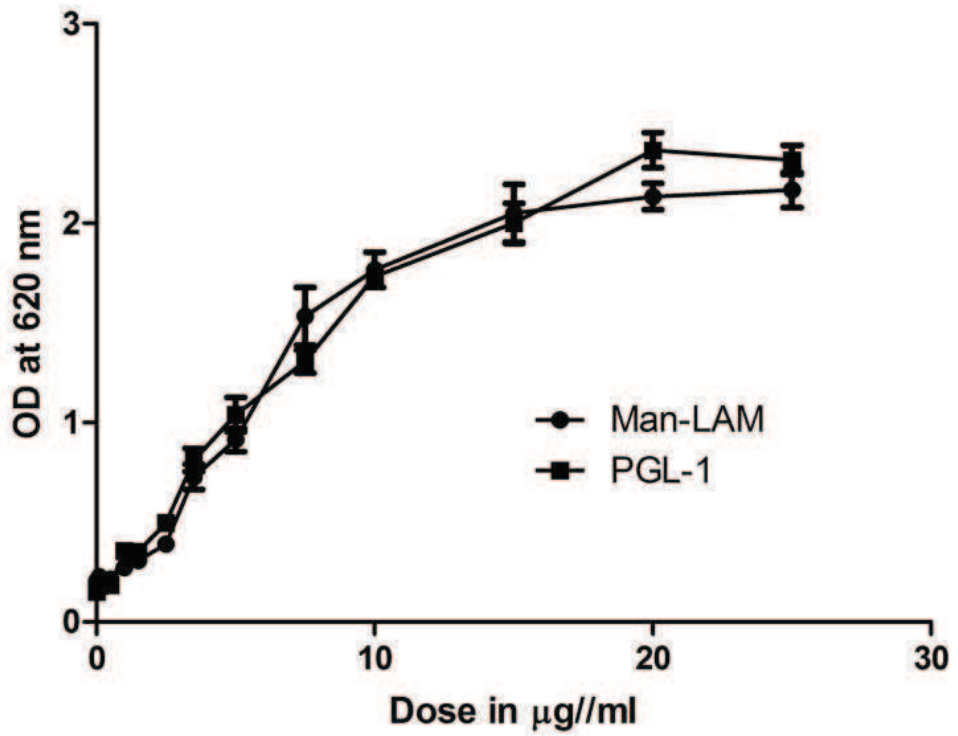

Figure:-S2

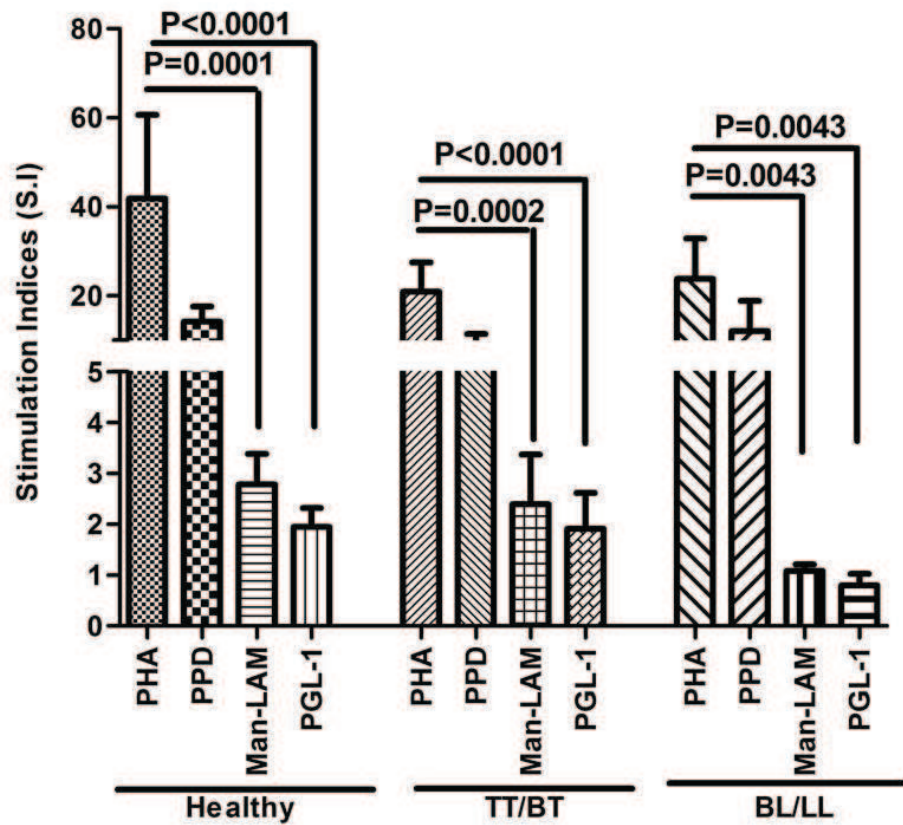

Supplement: 1476-511X-11-119-S1.pdf [file 1476-511X-11-119-S1.pdf]
